# Supplementary material for: Coumarin Derivatives Act as Novel Inhibitors of Human Dipeptidyl Peptidase III: Combined In Vitro and In Silico Study
Source: MDPI journal article supplement (doi:10.3390/ph14060540), 2021-06-05
Supplement: s1 [file s1]

## Supplementary material

### Coumarin derivatives act as novel inhibitors of human dipeptidyl peptidase III: combined in vitro and in silico study.

Dejan Agić<sup>1\*</sup>, Maja Karnas<sup>1</sup>, Domagoj Šubarić<sup>1</sup>, Melita Lončarić<sup>2</sup>, Sanja Tomić<sup>3</sup>, Zrinka Karačić<sup>3</sup>, Drago Bešlo<sup>1</sup>, Vesna Rastija<sup>1</sup>, Maja Molnar<sup>2</sup>, Boris M. Popović<sup>4</sup> and Miroslav Lisjak<sup>1</sup>.

1. Faculty of Agrobiotechnical Sciences Osijek. Josip Juraj Strossmayer University of Osijek. 31000 Osijek. Croatia; dejan.agic@fazos.hr (D.A.); maja.karnas@fazos.hr (M.K.); domagoj.subaric@fazos.hr (D.Š.); vesna.rastija@fazos.hr (V.R.); drago.beslo@fazos.hr (D.B.); miroslav.lisjak@fazos.hr (M.L.)
2. Faculty of Food Technology Osijek. Josip Juraj Strossmayer University of Osijek. 31000 Osijek. Croatia; melita.loncaric@ptfos.hr (M.L.); maja.molnar@ptfos.hr (M.M.)
3. Division of Organic Chemistry and Biochemistry. Ruđer Bošković Institute. 10000 Zagreb. Croatia; sanja.tomic@irb.hr (S.T.); zrinka.karacic@irb.hr (Z.K.)
4. Department of Field and Vegetable Crops. Faculty of Agriculture. University of Novi Sad. 21000 Novi Sad. Serbia; boris.popovic@polj.uns.ac.rs (B.P.)

\*Correspondence: dejan.agic@fazos.hr (D.A.)

**Table S1** The values of the descriptors included in QSAR model equation (2):  $\log \% \text{hDPP III inh.} = -4.07 + 1.85 (0.59) \text{EEig05x} + 1.60 (0.52) \text{Mor10u} + 0.56 (0.39) \text{nArOH}$

| MolID in QSARINS | Compound | EEig05x | Mor10u | nArOH | log(% inh DPP III) exp. | log(% inh DPP III) calc. by Eq 2 |
|------------------|----------|---------|--------|-------|-------------------------|----------------------------------|
| 1                | 31       | 2.864   | -0.442 | 0     | 0.00                    | -                                |
| 2                | 15       | 3.015   | -0.538 | 0     | 0.98                    | 0.65                             |
| 3                | 11       | 3.474   | -0.735 | 0     | 1.36                    | 1.18                             |
| 4                | 24       | 3.010   | -0.387 | 0     | 0.00                    | -                                |
| 5                | 34       | 3.000   | -0.434 | 1     | 1.37                    | 1.35                             |
| 6                | 27       | 3.010   | -0.188 | 1     | 1.82                    | 1.76                             |
| 7                | 25       | 3.010   | -0.359 | 0     | 1.30                    | 0.93                             |
| 8                | 9        | 3.295   | -0.450 | 0     | 0.00                    | -                                |
| 9                | 37       | 2.951   | -0.522 | 0     | 0.00                    | 0.56                             |
| 10               | 29       | 2.962   | -0.719 | 0     | 0.00                    | 0.26                             |
| 11               | 35       | 3.000   | -0.529 | 0     | 1.00                    | 0.64                             |
| 12               | 30       | 2.867   | -0.543 | 0     | 0.00                    | 0.37                             |
| 13               | 14       | 3.211   | -0.852 | 0     | 0.00                    | -                                |
| 14               | 33       | 3.001   | -0.013 | 0     | 1.33                    | 1.46                             |
| 15               | 26       | 3.011   | -0.009 | 0     | 1.78                    | 1.49                             |
| 16               | 7        | 2.857   | -0.127 | 0     | 0.89                    | 1.01                             |
| 17               | 23       | 2.868   | -0.355 | 0     | 0.00                    | -                                |
| 18               | 6        | 2.857   | 0.116  | 1     | 0.00                    | -                                |

|           |    |       |        |   |      |                     |
|-----------|----|-------|--------|---|------|---------------------|
| <b>19</b> | 21 | 2.874 | -0.086 | 1 | 1.80 | 1.67                |
| <b>20</b> | 4  | 2.916 | -0.117 | 1 | 1.21 | 1.70                |
| <b>21</b> | 3  | 2.929 | -0.525 | 0 | 0.00 | -                   |
| <b>22</b> | 1  | 2.966 | -0.080 | 0 | 1.45 | 1.29                |
| <b>23</b> | 16 | 3.027 | -0.348 | 0 | 0.90 | 0.98                |
| <b>24</b> | 2  | 2.966 | -0.041 | 1 | 1.11 | excluded as outlier |
| <b>25</b> | 18 | 3.027 | -0.174 | 1 | 1.65 | 1.81                |
| <b>26</b> | 20 | 2.984 | -0.492 | 0 | 0.00 | -                   |
| <b>27</b> | 17 | 3.027 | -0.442 | 0 | 1.30 | 0.83                |
| <b>28</b> | 5  | 2.857 | -0.541 | 0 | 0.00 | 0.35                |
| <b>29</b> | 22 | 2.875 | -0.676 | 0 | 0.00 | 0.17                |
| <b>30</b> | 38 | 2.863 | -0.397 | 0 | 0.35 | 0.59                |
| <b>31</b> | 19 | 3.312 | -0.639 | 0 | 0.85 | 1.04                |
| <b>32</b> | 36 | 2.948 | -0.277 | 1 | 2.00 | 1.50                |
| <b>33</b> | 12 | 3.239 | -0.374 | 1 | 2.00 | 1.89                |
| <b>34</b> | 32 | 3.000 | -0.439 | 0 | 0.81 | 0.78                |
| <b>35</b> | 8  | 3.210 | -0.540 | 0 | 0.64 | 1.01                |
| <b>36</b> | 13 | 3.239 | -0.716 | 0 | 1.22 | 0.78                |
| <b>37</b> | 10 | 3.210 | -0.304 | 1 | 1.83 | 1.95                |
| <b>38</b> | 28 | 3.273 | -0.102 | 0 | 1.47 | 1.82                |
| <b>39</b> | 39 | 2.344 | -0.399 | 0 | 0.00 | -0.37               |
| <b>40</b> | 40 | 2.410 | -0.289 | 1 | 0.33 | 0.49                |
| <b>41</b> |    | 3.340 | -0.091 | 2 |      | 3.08                |
| <b>42</b> |    | 3.295 | -0.088 | 2 |      | 3.01                |

---

- Inactive compounds excluded from QSAR

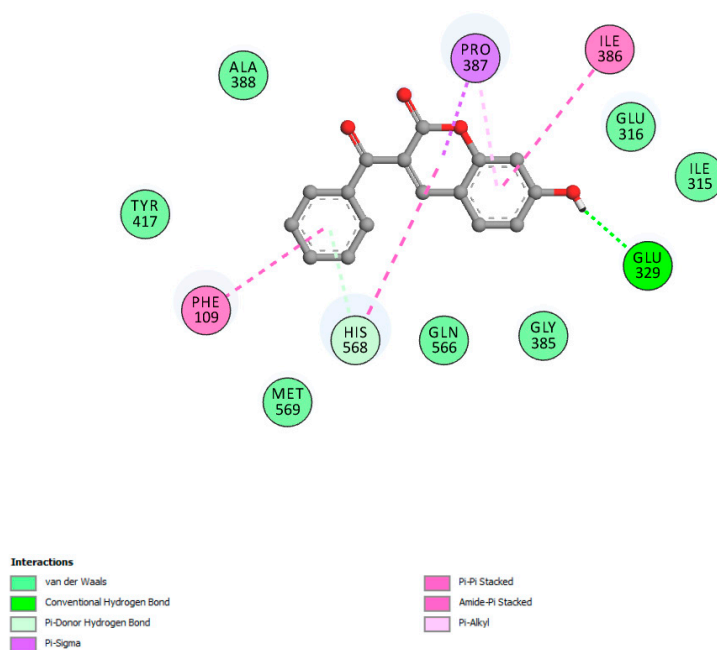

**Figure S1** 2D diagram of compound **12** interactions with the hDPP III residues for the best docking pose.

**Table S2** Detailed analysis of hydrogen bonds between compound **12** (LIG) and hDPP III residues during MD simulations for run 1, 2 and 3 obtained by *hbond* command in CPPTRAJ module.

| RUN | Acceptor    | Donor H      | Donor       | Frames | Fraction | AvgDist | AvgAngle |
|-----|-------------|--------------|-------------|--------|----------|---------|----------|
| 1   | GLU_329@OE2 | LIG@H1       | LIG@O4      | 29794  | 0.9931   | 2.6228  | 165.3042 |
|     | LIG@O3      | GLN_566@HE22 | GLN_566@NE2 | 6794   | 0.2265   | 2.8563  | 155.2041 |
|     | LIG@O2      | GLN_566@HE22 | GLN_566@NE2 | 1476   | 0.0492   | 2.8484  | 147.1674 |
|     | LIG@O2      | TYR_318@HH   | TYR_318@OH  | 1241   | 0.0414   | 2.7842  | 160.8479 |
| 2   | GLU_329@OE1 | LIG@H1       | LIG@O4      | 25524  | 0.8508   | 2.6332  | 164.773  |
|     | LIG@O2      | ASN_391@H    | ASN_391@N   | 5150   | 0.1717   | 2.8898  | 156.9507 |
|     | LIG@O3      | ASN_391@HD22 | ASN_391@ND2 | 4028   | 0.1343   | 2.8492  | 157.513  |
|     | LIG@O2      | ASN_391@HD22 | ASN_391@ND2 | 1788   | 0.0596   | 2.8756  | 155.3083 |
| 3   | GLU_329@OE2 | LIG@H1       | LIG@O4      | 29832  | 0.9944   | 2.6313  | 164.7486 |
|     | LIG@O3      | TYR_417@HH   | TYR_417@OH  | 1180   | 0.0393   | 2.7920  | 157.2633 |
|     | LIG@O3      | HIE_568@HE2  | HIE_568@NE2 | 1078   | 0.0359   | 2.8720  | 151.3918 |
|     | LIG@O2      | HIE_568@HE2  | HIE_568@NE2 | 911    | 0.0304   | 2.8777  | 153.9514 |

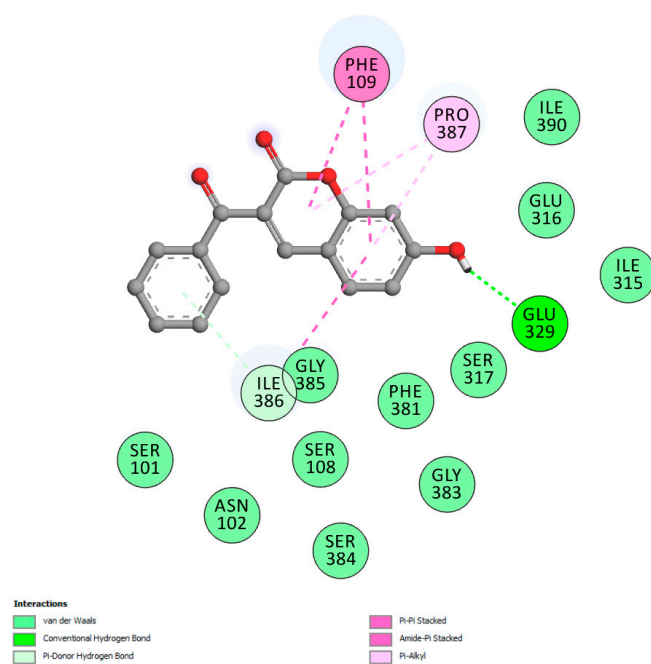

**Figure S2** 2D diagram of compound **12** interactions with the hDPP III residues for run 1

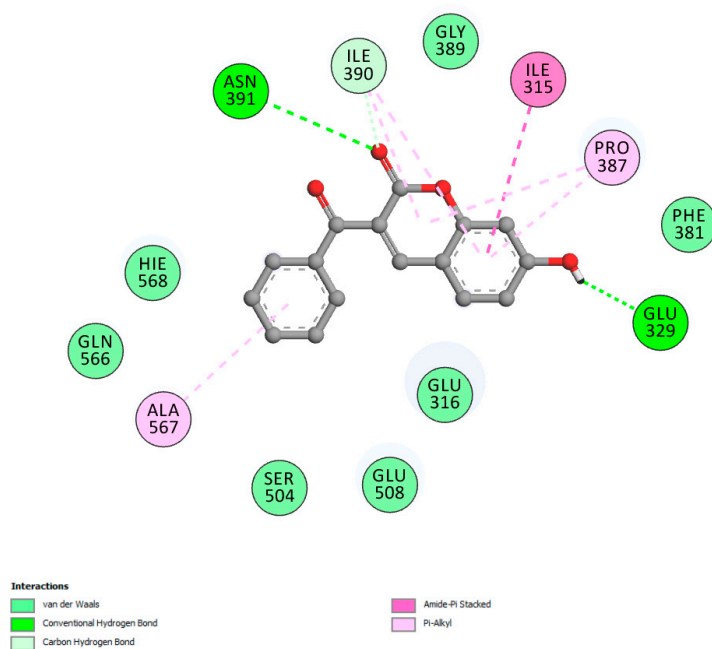

**Figure S3** 2D diagram of compound **12** interactions with the hDPP III residues for run 2

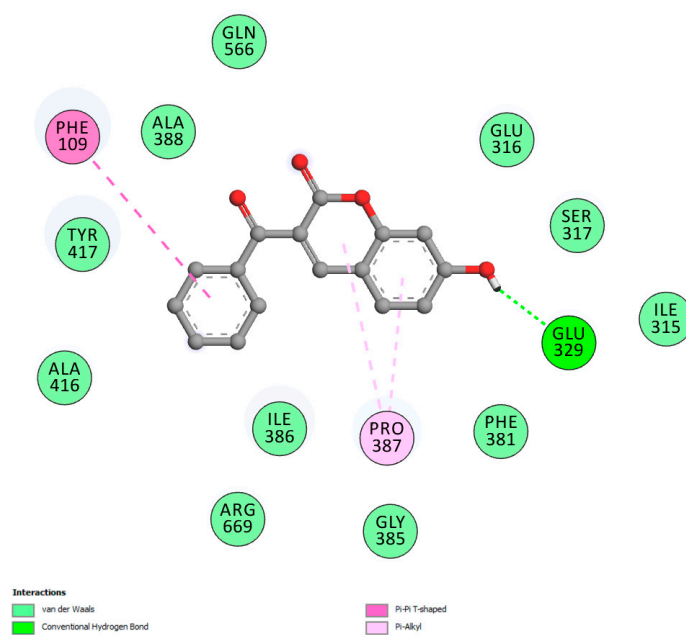

**Figure S4** 2D diagram of compound **12** interactions with the hDPP III residues for run 3

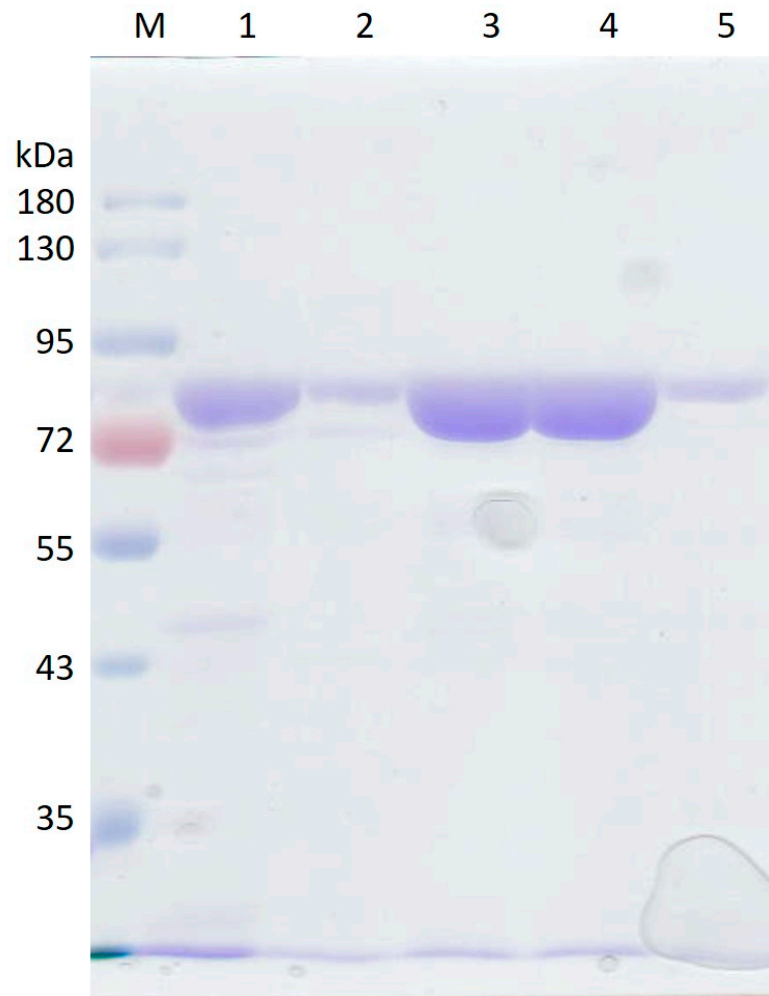

**Figure S5** SDS-PAGE demonstrating purity of hDPP III sample on a 10% gel: M. PageRuler Prestained protein marker. with 72 kDa band in red; lane 1. hDPP III sample after affinity chromatography; lanes 2-5. fractions of the main hDPP III peak after gel-filtration.
